# Supplementary material for: Primary care physicians’ satisfaction after health care reform: a cross-sectional study from two cities in Central Java, Indonesia
Source: PubMed Central journal article supplement (PMC6505224; doi:10.1186/s12913-019-4121-2), 2019-05-08
Supplement: 12913_2019_4121_MOESM3_ESM.pdf [file 12913_2019_4121_MOESM3_ESM.pdf]

Additional file 3: Questionnaire: PCP satisfaction.

**D. Work Satisfaction**

Please indicate your level of satisfaction on each statement of aspects/facets of job satisfaction by thick (v) the colum based on your condition in **your main place of practice** .

**What is level your satisfaction in ...**

| No. | Aspects                                                                                                                                                                           | Extremely not satisfied | Not satisfied | Neutral | Satisfied | Extremely satisfied |
|-----|-----------------------------------------------------------------------------------------------------------------------------------------------------------------------------------|-------------------------|---------------|---------|-----------|---------------------|
|     |                                                                                                                                                                                   | (1)                     | (2)           | (3)     | (4)       | (5)                 |
| 1   | Physical working condition                                                                                                                                                        |                         |               |         |           |                     |
| 2   | Hours of work                                                                                                                                                                     |                         |               |         |           |                     |
| 3   | Workload/task as JKN physicians                                                                                                                                                   |                         |               |         |           |                     |
| 4   | Relationship with JKN patient                                                                                                                                                     |                         |               |         |           |                     |
| 5   | Relationship with colleagues/ co-worker (physician, dentist/networking dentist, nurse, midwives/networking midwives, pharmacist, laboratory analyst, administrative staffs, etc.) |                         |               |         |           |                     |
| 6   | Relationship with BPJS for Health                                                                                                                                                 |                         |               |         |           |                     |
| 7   | Role of health authority and professional association about JKN                                                                                                                   |                         |               |         |           |                     |
| 8   | Income                                                                                                                                                                            |                         |               |         |           |                     |
| 9   | Freedom of working method /Autonomy                                                                                                                                               |                         |               |         |           |                     |
| 10  | Recognition for good work                                                                                                                                                         |                         |               |         |           |                     |
| 11  | Opportunity to use abilities                                                                                                                                                      |                         |               |         |           |                     |
| 12  | Adequacy of your previous education with your job                                                                                                                                 |                         |               |         |           |                     |
| 13  | Providing health care for patient with 144 diagnoses                                                                                                                              |                         |               |         |           |                     |
| 14  | Referral in JKN                                                                                                                                                                   |                         |               |         |           |                     |
| 15  | Health service standard for JKN patient, for instance 144 diagnoses, formularium and coverage of diagnosis examination                                                            |                         |               |         |           |                     |
| 16  | JKN programme, for instance home visit, medical history screening, Chronic diseases management programme (PROLANIS),etc.                                                          |                         |               |         |           |                     |
| 17  | Capitation system for PHC                                                                                                                                                         |                         |               |         |           |                     |
| 18  | JKN policy as a whole                                                                                                                                                             |                         |               |         |           |                     |
| 19  | Social status for being a physician                                                                                                                                               |                         |               |         |           |                     |
