# Supplementary material for: Primary care physicians’ satisfaction after health care reform: a cross-sectional study from two cities in Central Java, Indonesia
Source: PubMed Central journal article supplement (PMC6505224; doi:10.1186/s12913-019-4121-2), 2019-05-08
Supplement: 12913_2019_4121_MOESM4_ESM.pdf [file 12913_2019_4121_MOESM4_ESM.pdf]

Additional file 4: Intention to leave practice.

**E. Intention to leave practice**

*Please give check sign (✓) on the options that appropriate with you carried out and explain the reason.*

**I. Intention to leave practice as PHC physician for JKN**

1. Do you want to leave your practice as JKN PHC physician in the main place practice?

a. Yes

*Reason*

---

---

b. No

*Reason*

---

---
